# Supplementary material for: Multiwalled Carbon Nanotubes Interact with Macrophages and Influence Tumor Progression and Metastasis
Source: PubMed Central journal article supplement — Theranostics. 2012 Mar 2;2(3):258–70. doi: 10.7150/thno.3629 (PMC3326737; doi:10.7150/thno.3629), 2012-03-02

# Multiwalled Carbon Nanotubes Interact with Macrophages and Influence Tumor Progression and Metastasis

Man Yang, et al.

## Supplementary Material

Fig.S1

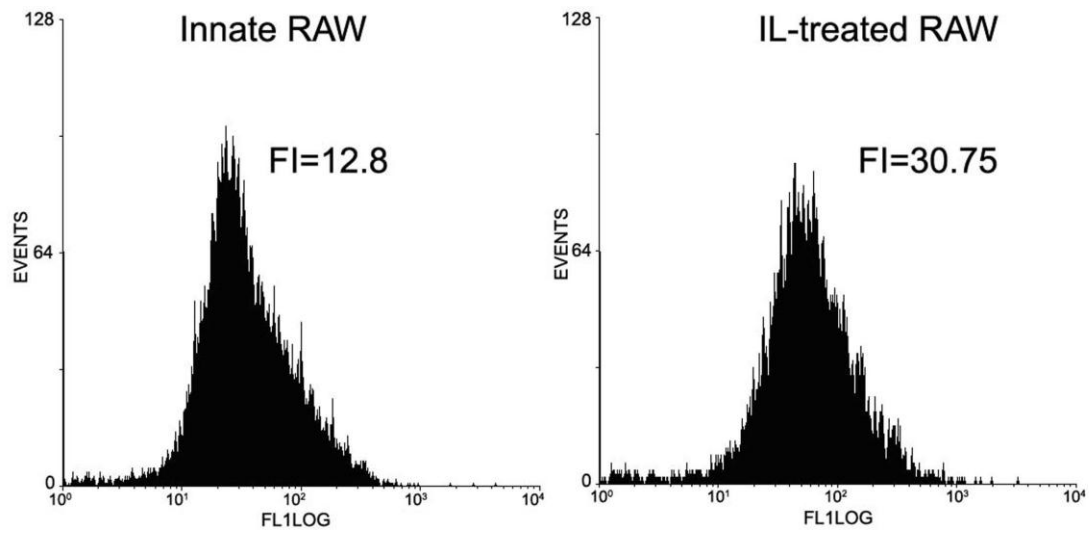

Supplement: thnov02p0258s1.pdf [file thnov02p0258s1.pdf]
